# Supplementary material for: A multifunctional fluorescent platform based on polyoxometalate-functionalized HOFs for 5-hydroxymethylfurfural, 2-furaldehyde and ascorbic acid sensing, logic computing and anti-counterfeiting
Source: Royal Society of Chemistry journal article supplement (doi:10.1039/d3tc00413a), 2023-01-01
Supplement: d3tc00413a1.pdf [file d3tc00413a1.pdf]

## Supporting information

**A multifunctional fluorescent platform based on polyoxometalate  
functionalized HOFs for 5-hydroxymethylfurfural, 2-furaldehyde and  
ascorbic acid sensing, logic computing and anti-counterfeiting**

Zishuo Zhang, Xin Xu, Bing Yan\*

*School of Chemical Science and Engineering, Tongji University, Siping Road 1239, Shanghai 200092,  
China.*

---

\* Corresponding author: Email address: [byan@tongji.edu.cn](mailto:byan@tongji.edu.cn) (Bing Yan)

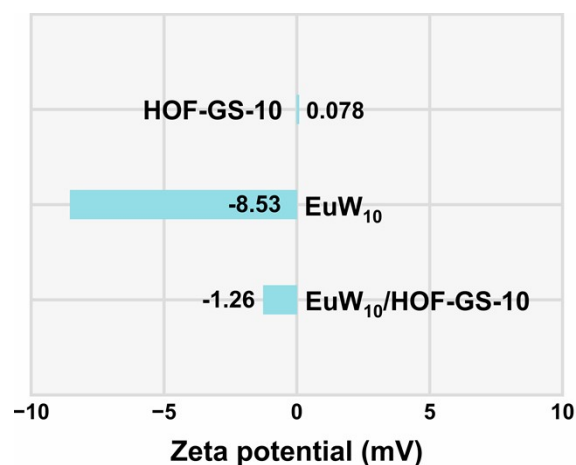

**Figure S1**  $\xi$ -Potential analysis of EuW<sub>10</sub>, HOF-GS-10 and EuW<sub>10</sub>/HOF-GS-10 (**1**) suspensions.

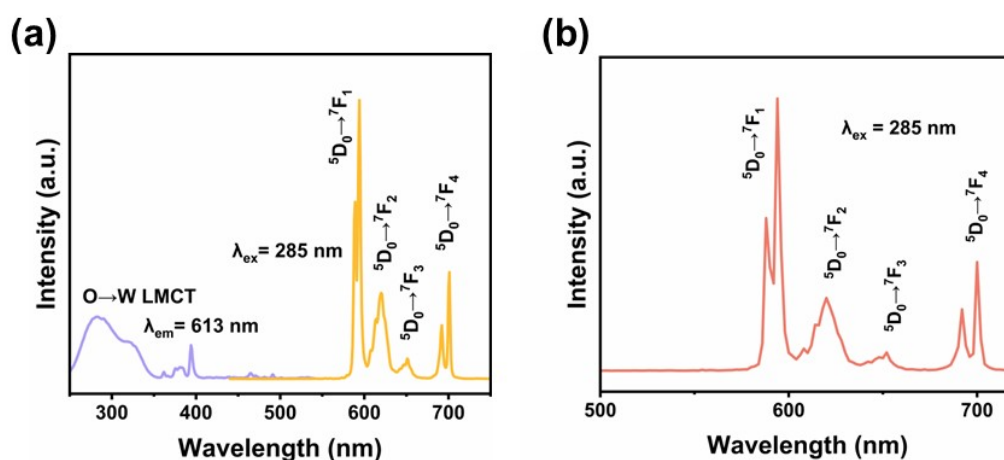

**Figure S2** (a) The solid-state excitation and emission spectra of EuW<sub>10</sub>. (b) The emission spectrum of EuW<sub>10</sub> in solution at the 285 nm excitation.

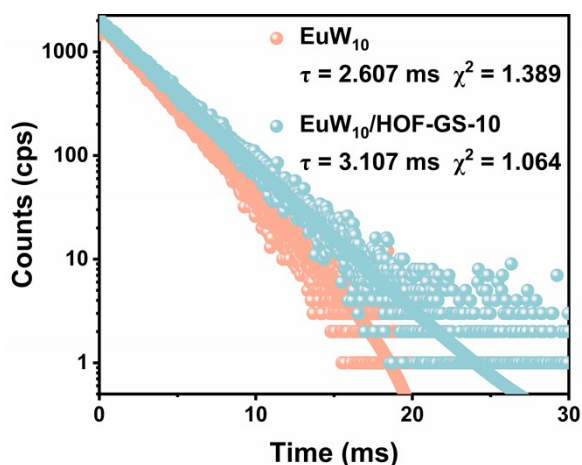

**Figure S3** Decay lifetimes curve of the emission peak at 613 nm for EuW<sub>10</sub> ( $\lambda_{ex} = 285$  nm) and that of **1** at 595 nm ( $\lambda_{ex} = 310$  nm).

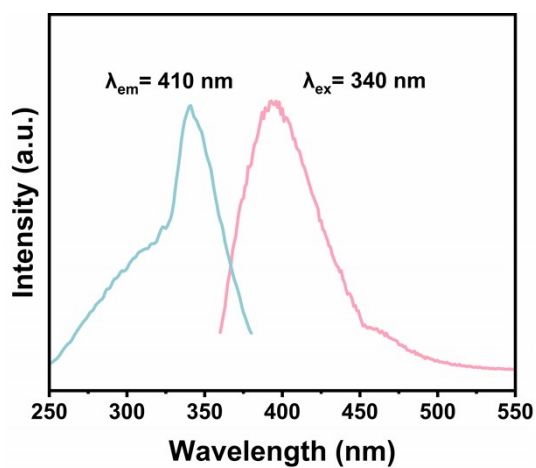

**Figure S4** The solid-state fluorescence excitation and emission spectra of HOF-GS-10.

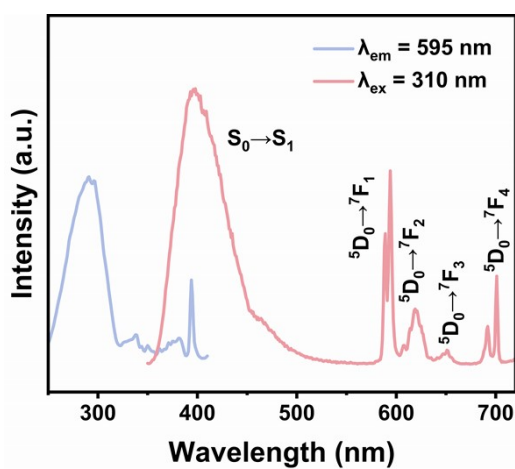

**Figure S5** The solid-state fluorescence excitation and emission spectra of **1**.

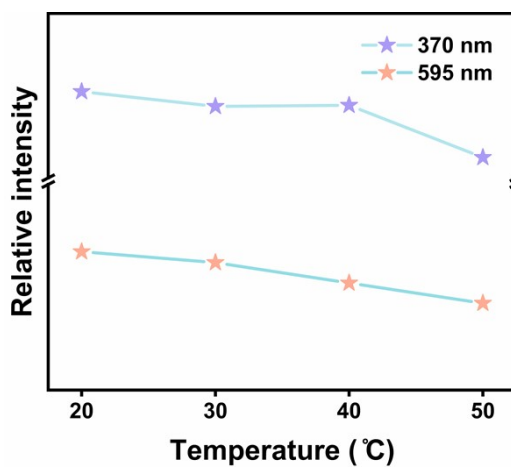

**Figure S6** The emission intensity of **1** at 370 and 595 nm at different temperatures upon 310 nm excitation.

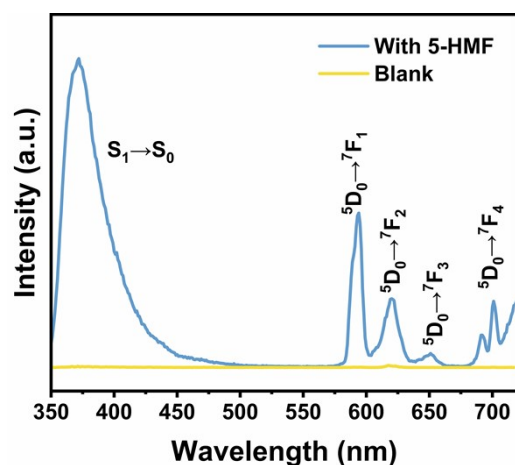

**Figure S7** The fluorescence emission spectrum of **1** before and after adding 5-HMF ( $10^{-2}$  M) ( $\lambda_{\text{ex}} = 310$  nm).

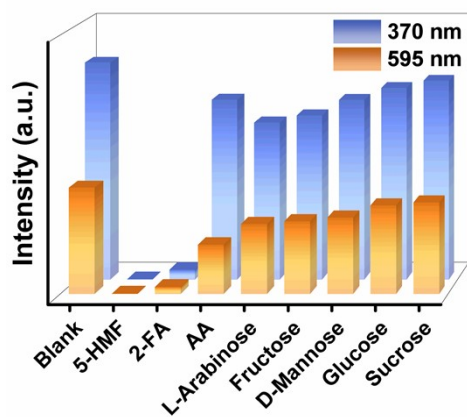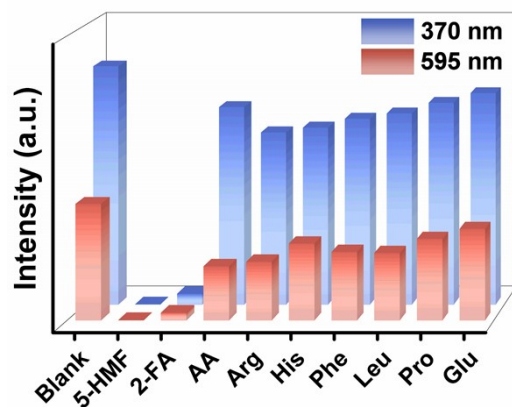

**Figure S8** The histogram of emission intensity at 370 and 595 nm with addition of saccharides and amino acids.

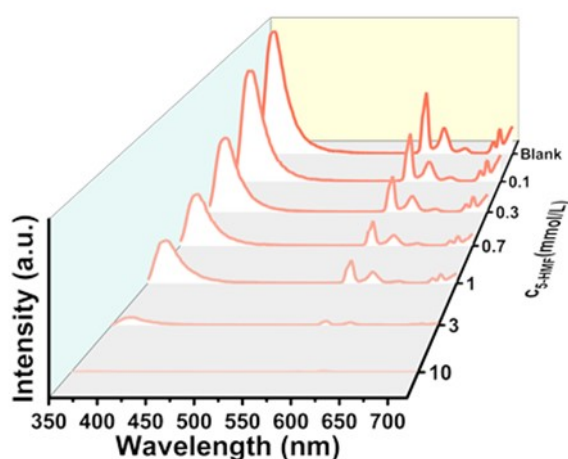

**Figure S9** Fluorescence response spectra of **1** toward different concentrations of 5-HMF ( $\lambda_{\text{ex}} = 310$  nm).

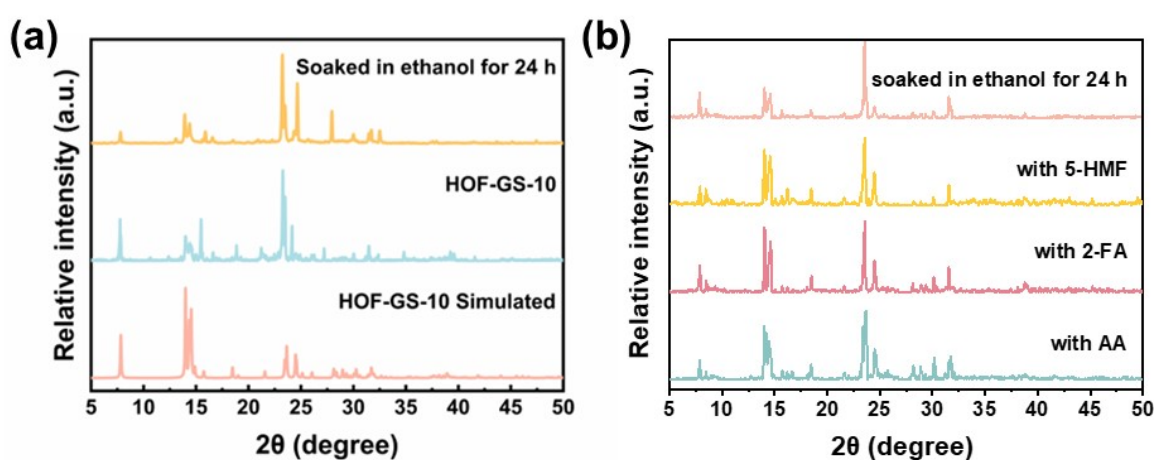

**Figure S10** (a)PXRD patterns of HOF-GS-10 after treated by soaking in ethanol for 24h. (b) PXRD patterns of **1** after treated by soaking in ethanol for 24h and by containing 5-HMF, 2-FA and AA solutions.

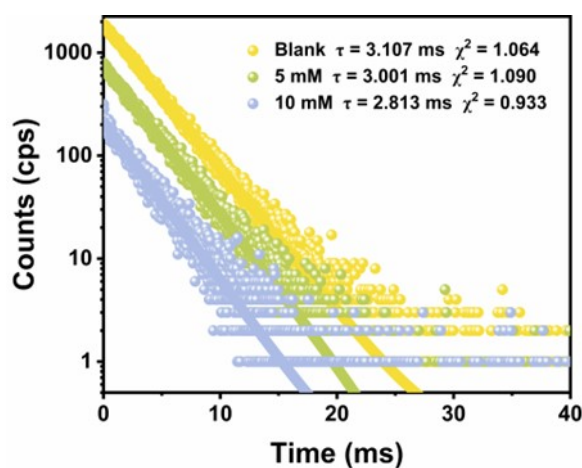

**Figure S11** The time-resolved fluorescence decay spectra of **1** before and after adding different concentration of 5-HMF.

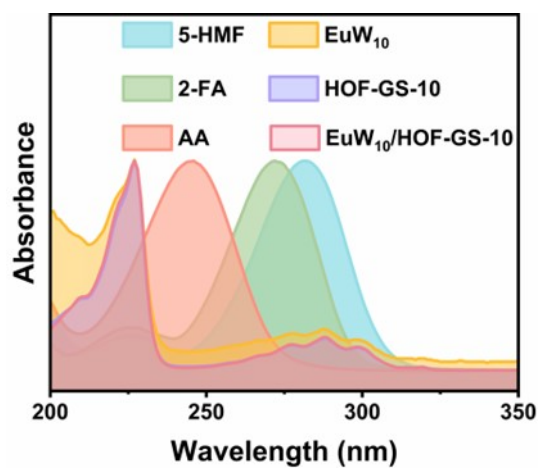

Figure S12 The UV-vis absorption of EuW<sub>10</sub>, HOF-GS-10 and 1.

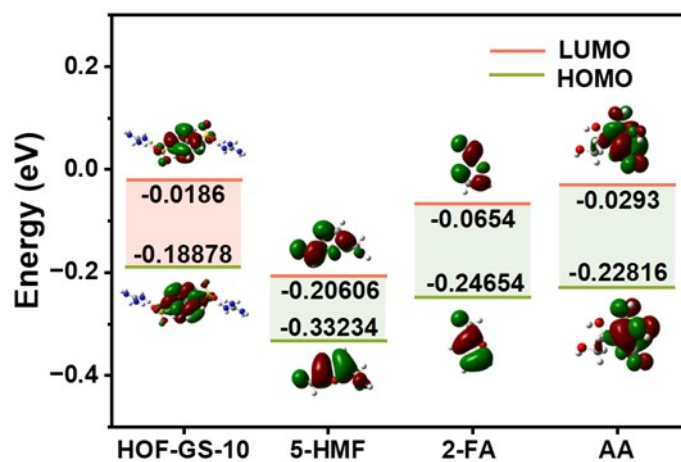

Figure S13 LUMO and HOMO levels of HOF-GS-10 and 5-HMF, 2-FA and AA.

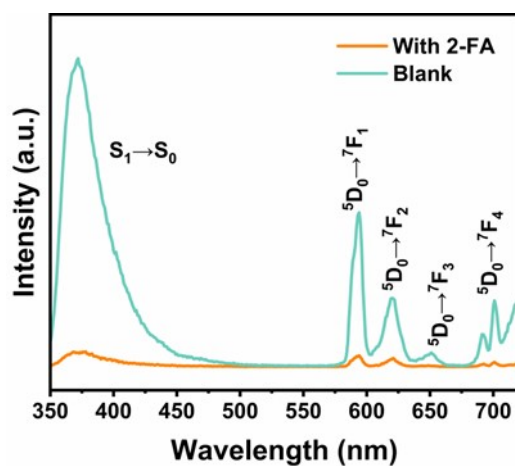

Figure S14 LUMO and HOMO levels of HOF-GS-10 and 5-HMF, 2-FA and AA.

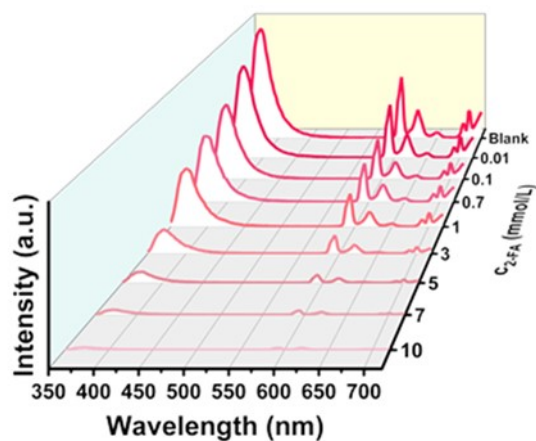

**Figure S15** Fluorescence response spectra of **1** toward different concentrations of 2-FA ( $\lambda_{ex} = 310$  nm).

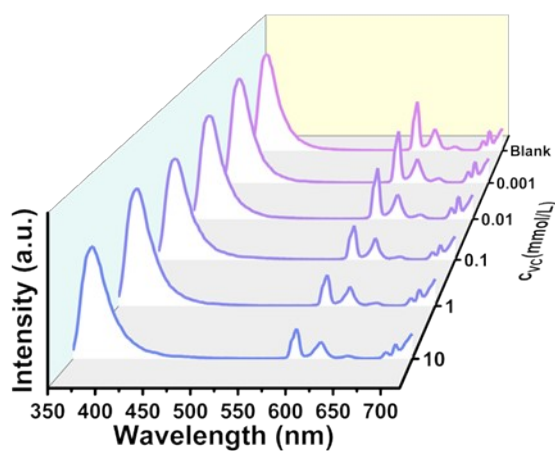

**Figure S16** Fluorescence response spectra of **1** toward different concentrations of AA ( $\lambda_{ex} = 310$  nm).

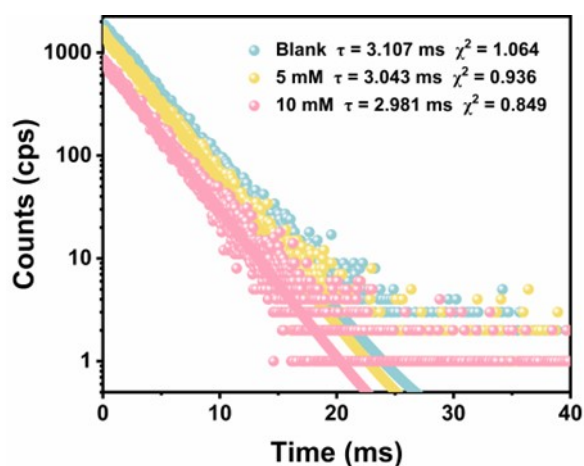

**Figure S17** The time-resolved fluorescence decay spectra of **1** before and after adding different concentration of 2-FA.

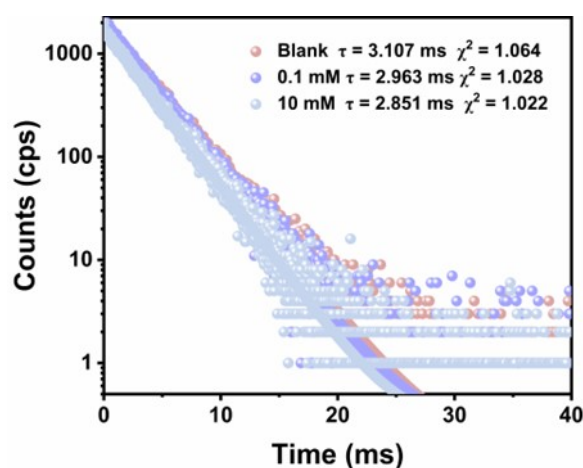

**Figure S18** The time-resolved fluorescence decay spectra of **1** before and after adding different concentration of AA.

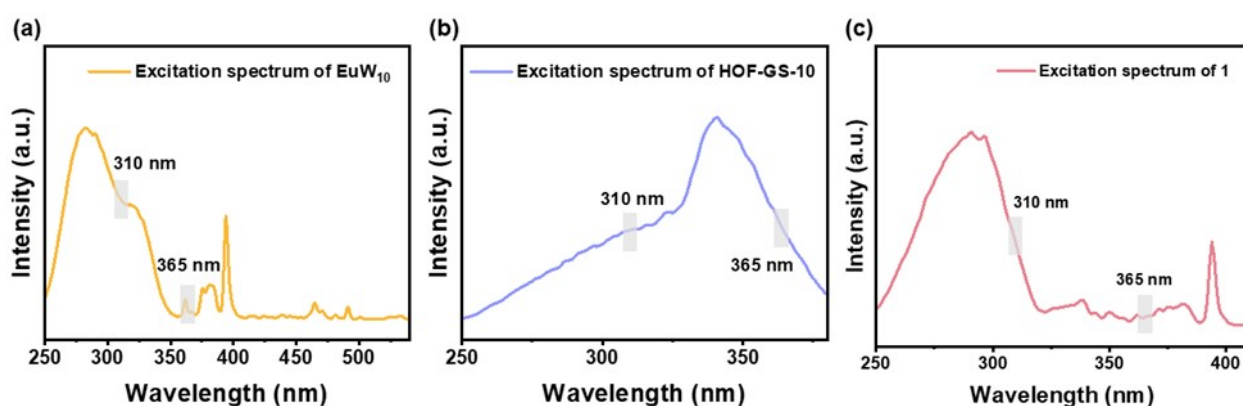

**Figure S19** The fluorescence excitation spectra of (a) EuW<sub>10</sub>, (b) HOF-GS-10 and (c) **1**.

**Table. S1.** ICP-OES analysis of **1**.

| Samples                      | Eu (wt%) | W (wt%) |
|------------------------------|----------|---------|
| EuW <sub>10</sub> /HOF-GS-10 | 0.517    | 7.841   |

**Table. S2.** Summary of detection method and detection limit (LOD) of 5-HMF, 2-FA and AA.

| Analytical method |                           | LOD (μM) | Reference |
|-------------------|---------------------------|----------|-----------|
| 5-HMF             | Fluorescent detection     | 43       | [1]       |
|                   | SERS                      | 75       | [2]       |
|                   | HPLC/diode-array detector | 1.98     | [3]       |
|                   | SPE-LC-MS                 | 1.54     | [4]       |
|                   | Fluorescent detection     | 1.116    | This work |
| 2-FA              | SERS                      | 11       | [5]       |
|                   | HPLC/diode-array detector | 1.04     | [3]       |



|    |                       |       |           |
|----|-----------------------|-------|-----------|
|    | Fluorescent detection | 1.448 | This work |
| AA | Fluorescent detection | 74    | [6]       |
|    | Fluorescent detection | 6     | [7]       |
|    | Fluorescent detection | 1.3   | [8]       |
|    | Fluorescent detection | 8.837 | This work |

Calculation method for LOD:

The limit of detection is calculated according to the previous work. The calculation formula is listed as follows:

$$\frac{3.3\sigma}{LOD} = \frac{\text{Signal Intensity (A)}}{\text{Concentration (A)}}$$

where  $\sigma$  is the standard deviation of fluorescent intensity of blank solutions for 20 repeated measurements and A is the corresponding value at the analyte's minimum concentration in the linear relationship.<sup>9</sup>

## References

- 1 K. Luo, H. Chen, Q. Zhou, Z. Yan, Z. Su and K. Li, *Anal. Chim. Acta*, 2020, **1124**, 113-120.
- 2 J. Zhang, Y. Li, M. Lv, Y. Bai, Z. Liu, X. Weng and C. You, *Spectrochim. Acta, Part A*, 2022, **279**, 121393.
- 3 P. Chambel, M. B. Oliveira, P. B. Andrade, R. M. Seabra and M. A. Ferreira, *J. Liq. Chromatogr. Relat. Technol.*, 2006, **20**, 2949-2957.
- 4 S. Imperiale, K. Morozova, G. Ferrentino, M. R. Alam and M. Scampicchio, *Food Anal. Methods*, 2021, **15**, 1-9.
- 5 H. Shi, W. Chen, F. Wan, L. Du, S. Zhang, W. Zhou, J. Zhang, Y. Huang and C. Zhu, *Nanomaterials*, 2018, **9**, 17.
- 6 N. Selivanova and Y. Galyametdinov, *Chemosensors*, 2021, **9**, 134.
- 7 J. Song, X. Guo, H. Chen, Y. Tang and L. Han, *Molecules*, 2023, **28**, 2162.
- 8 J. Zhu, Z.-J. Zhao, J.-J. Li and J.-W. Zhao, *J. Lumin.*, 2017, **192**, 47-55.
- 9 D. Kong, J. Zhao, S. Tang, W. Shen and H. K. Lee, *Anal. Chem.*, 2021, **93**, 12156-12161.
